# Supplementary material for: Improvement of photocatalytic activity in the degradation of 4-chlorophenol and phenol in aqueous medium using tin-modified TiO2 photocatalysts
Source: Royal Society of Chemistry journal article supplement (doi:10.1039/d3ra01910a), 2023-01-01
Supplement: d3ra01910a1.pdf [file d3ra01910a1.pdf]

## Supplementary Information

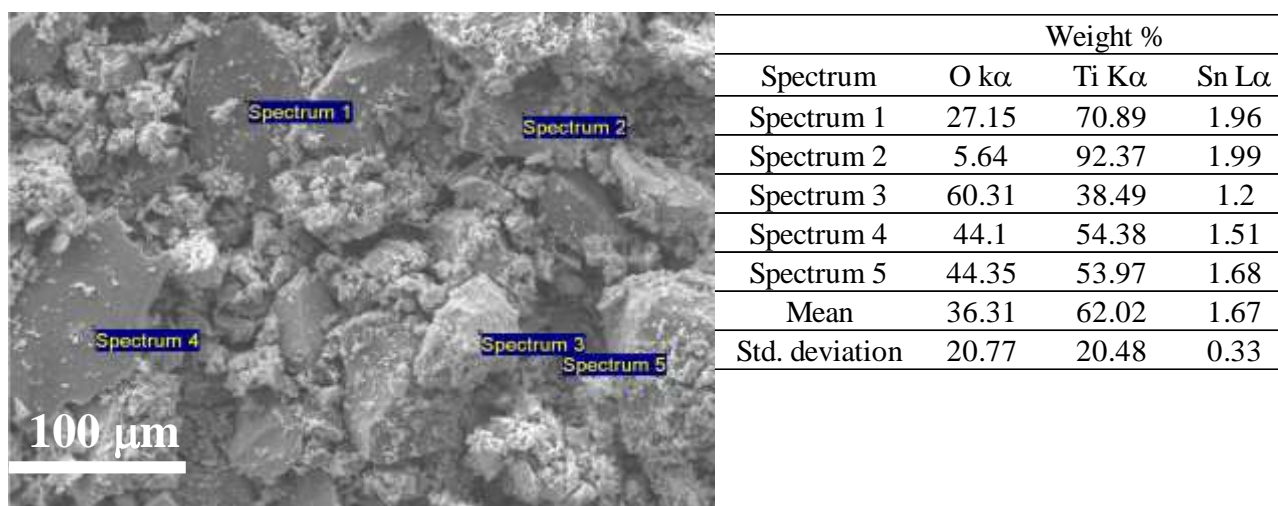

Supplementary Figure 1s. SEM analysis and punctual elemental analysis of the Sn1T photocatalyst in different areas analyzed.

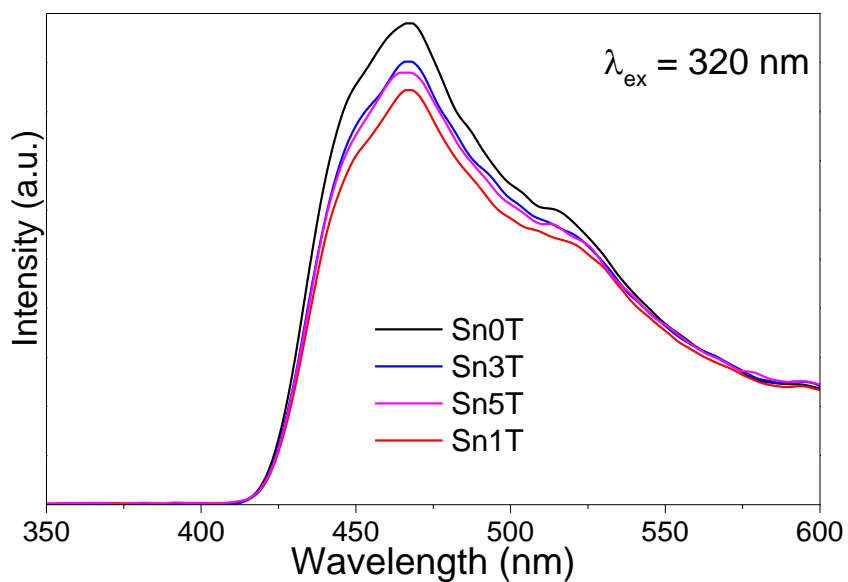

Supplementary Figure 2s. Photoluminescent spectra of photocatalyst Sn<sub>x</sub>T (x = 0, 1, 3, 5) upon excitation at 320 nm.
